# Supplementary material
Source: PubMed Central journal article supplement (PMC8993475)
Supplement: CJN.12890921SupplementaryData.pdf [file CJN.12890921SupplementaryData.pdf]

**Supplemental Material**

Supplemental Table 1. Type of monoclonal gammopathy of MGRS patients versus non-MGRS patients

Supplemental Table 1. Type of monoclonal gammopathy of MGRS patients versus non-MGRS patients

| Characteristics | Overall (n=687) | MGRS Lesions (n=261) | Non-MGRS Lesions (n=426) | P Value |
|-----------------|-----------------|----------------------|--------------------------|---------|
| Clonality       |                 |                      |                          |         |
| Serum(+)        |                 |                      |                          |         |
| Ig heavy chain  |                 |                      |                          |         |
| IgG(+)          | 296 (43%)       | 110 (42%)            | 186 (44%)                | 0.70    |
| IgA(+)          | 116 (17%)       | 43 (16%)             | 73 (17%)                 | 0.82    |
| IgM(+)          | 57 (8%)         | 18 (7%)              | 39 (9%)                  | 0.30    |
| Biclonal        | 11 (2%)         | 6 (2%)               | 5 (1%)                   | 0.25    |
| IgA&IgG&IgM(-)  | 143 (21%)       | 47 (18%)             | 96 (23%)                 | 0.17    |
| Ig light chain  |                 |                      |                          |         |
| κ(+)            | 232 (34%)       | 66 (25%)             | 166 (39%)                | <0.001  |
| λ(+)            | 370 (54%)       | 144 (55%)            | 226 (53%)                | 0.59    |
| κ&λ(+)          | 22 (3%)         | 5 (2%)               | 17 (4%)                  | 0.13    |
| κ&λ(-)          | 58 (8%)         | 7 (3%)               | 14 (3%)                  | 0.66    |
| Urine(+)        |                 |                      |                          |         |
| Ig heavy chain  |                 |                      |                          |         |
| IgG(+)          | 161 (23%)       | 68 (26%)             | 93 (22%)                 | 0.21    |
| IgA(+)          | 53 (8%)         | 21 (8%)              | 32 (8%)                  | 0.80    |
| IgM(+)          | 5 (1%)          | 0 (0%)               | 5 (1%)                   | 0.08    |
| Biclonal        | 4 (1%)          | 1 (0.3%)             | 3 (1%)                   | 0.59    |
| IgA&IgG&IgM(-)  | 197 (29%)       | 115 (44%)            | 82 (19%)                 | <0.001  |
| Ig light chain  |                 |                      |                          |         |
| κ(+)            | 146 (21%)       | 59 (22%)             | 87 (20%)                 | 0.50    |
| λ(+)            | 254 (37%)       | 140 (54%)            | 114 (27%)                | <0.001  |
| κ&λ(+)          | 5 (1%)          | 1 (0.3%)             | 4 (1%)                   | 0.41    |
| κ&λ(-)          | 15 (2%)         | 5 (2%)               | 10 (2%)                  | 0.71    |

Values for continuous variables are described as mean ± SD or median (IQR) depending on the distribution, and for categoric variables described as count (%)
